# Supplementary material for: Plasma Extracellular Vesicle-Derived TIMP-1 mRNA as a Prognostic Biomarker in Clear Cell Renal Cell Carcinoma: A Pilot Study
Source: PubMed Central journal article supplement (PMC7370073; doi:10.3390/ijms21134624), 2020-06-29
Supplement: ijms-21-04624-s001.pdf [file ijms-21-04624-s001.pdf]

Supplementary Material

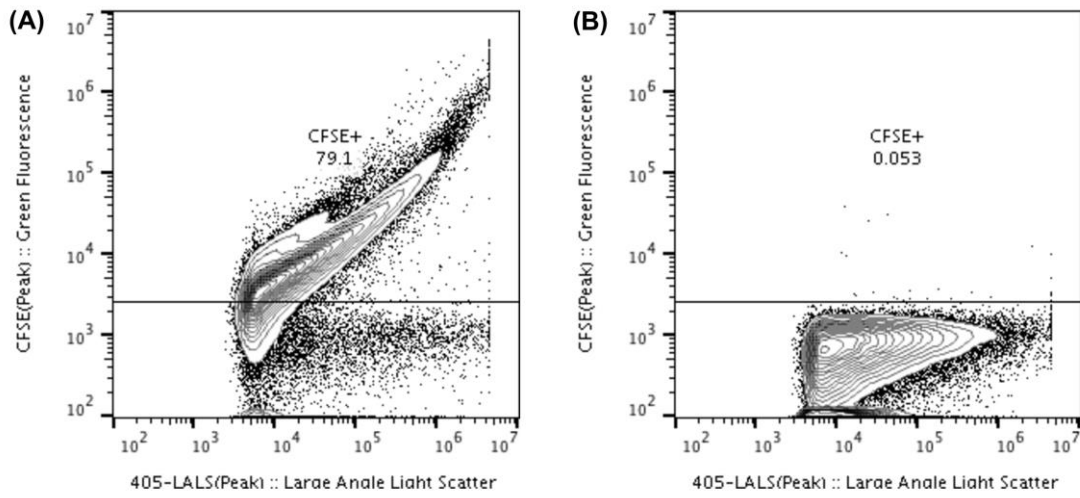

Figure S1 - Proportion of fluorescent EVs as observed by flow cytometry from a sample of EV isolate derived from a patient, either previously stained with CFSE (A) or without previous staining (B).

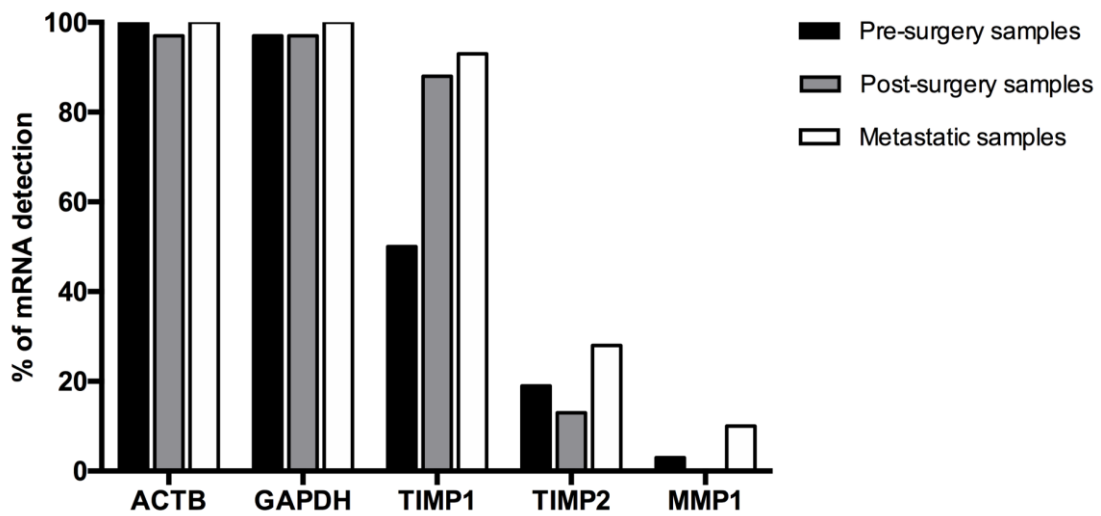

Figure S2 - Percentages of *ACTB*, *GAPDH*, *TIMP-1*, *TIMP-2* and *MMP1* mRNA detection in EVs derived from ccRCC patients.
